# Supplementary material for: Decoupling from yolk sac is required for extraembryonic tissue spreading in the scuttle fly Megaselia abdita
Source: eLife journal article supplement (doi:10.7554/elife.34616), 2018-10-30
Supplement: supp [file elife-34616-supp-v1.zip]

Archive with 13 entries (13 files):
- elife_poa_e34616_Figure_3_video_2.avi
- elife_poa_e34616_Figure_4_video_1.avi
- elife_poa_e34616_Figure_3_video_1.avi
- elife_poa_e34616_Figure_4_figure_supplement_1.pdf
- elife_poa_e34616_Figure_4_figure_supplement_2.pdf
- elife_poa_e34616_Figure_1_figure_supplement_1.pdf
- elife_poa_e34616_Figure_2_video_1.avi
- elife_poa_e34616_Figure_2_video_2.avi
- elife_poa_e34616_Transparent_Reporting_File.docx
- elife_poa_e34616_Figure_5_figure_supplement_1.pdf
- elife_poa_e34616_Figure_2_figure_supplement_1.pdf
- elife_poa_e34616_Figure_3_figure_supplement_1.pdf
- elife_poa_e34616_Figure_5_video1.avi
