# Supplementary figures and images for: Decoupling from yolk sac is required for extraembryonic tissue spreading in the scuttle fly Megaselia abdita
Source: eLife journal article supplement (doi:10.7554/elife.34616), 2018-10-30

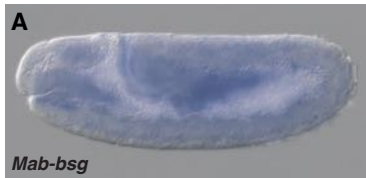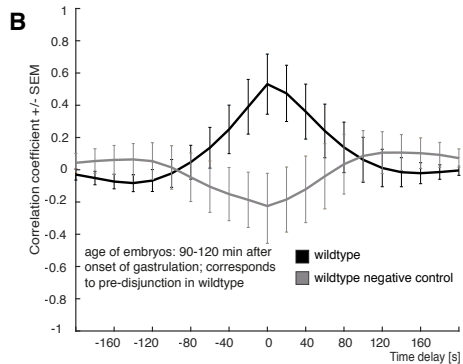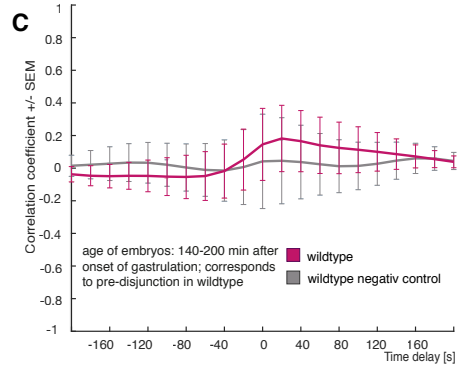

Supplement: supp [file elife-34616-supp-v1.zip › elife_poa_e34616_Figure_4_figure_supplement_1.pdf]

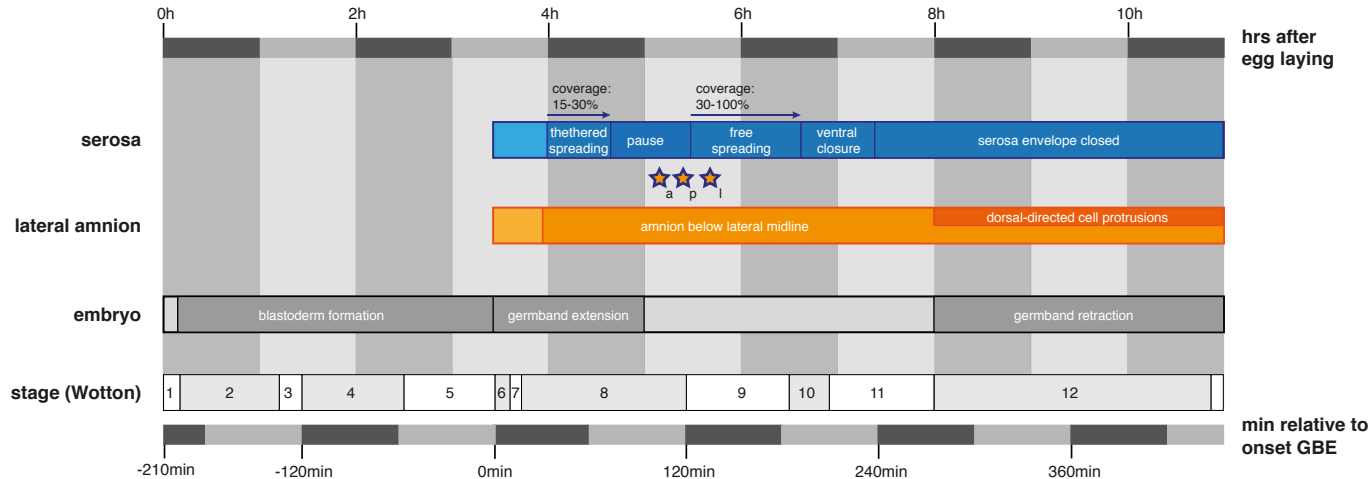

Supplement: supp [file elife-34616-supp-v1.zip › elife_poa_e34616_Figure_4_figure_supplement_2.pdf]

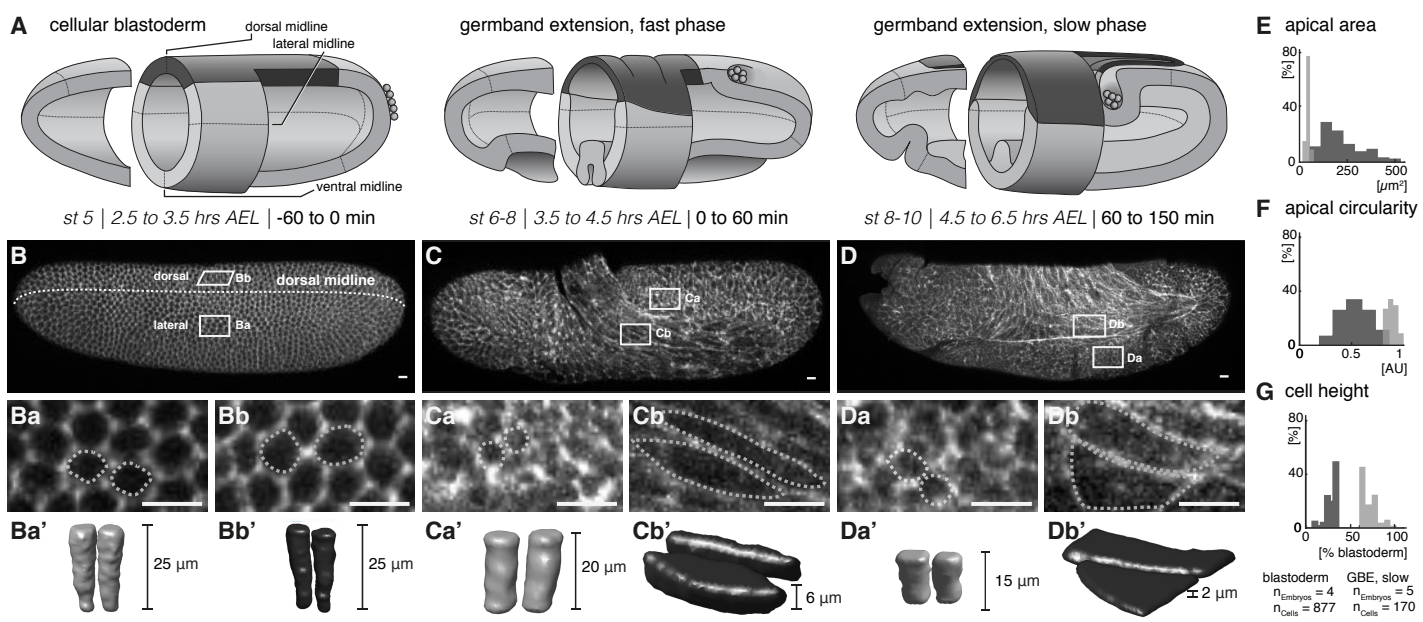

Supplement: supp [file elife-34616-supp-v1.zip › elife_poa_e34616_Figure_1_figure_supplement_1.pdf]

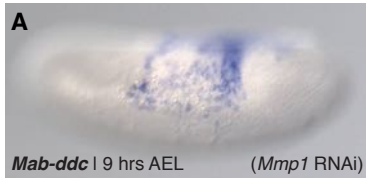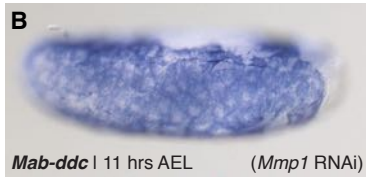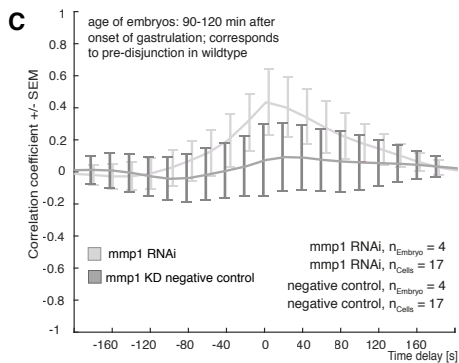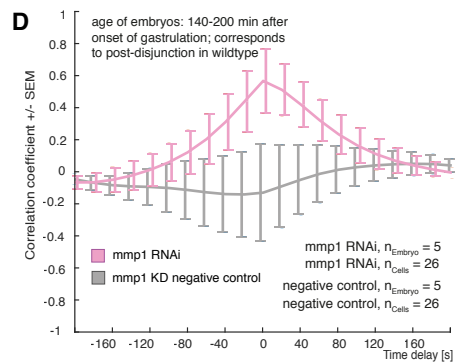

Supplement: supp [file elife-34616-supp-v1.zip › elife_poa_e34616_Figure_5_figure_supplement_1.pdf]

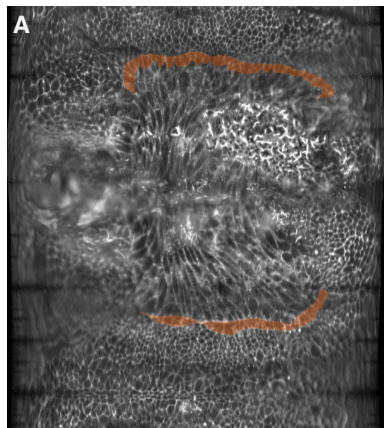

surface layer

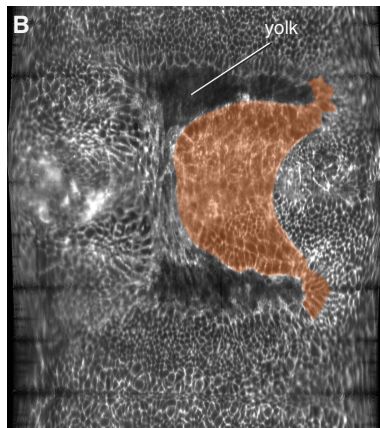

surface layer removed

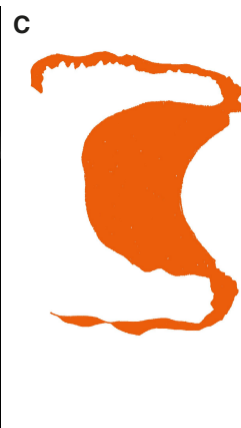

combined mask

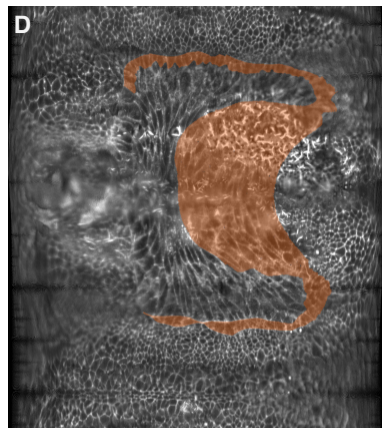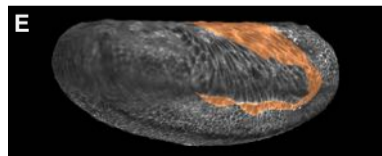

projection of marked  
surface back into 3D

Supplement: supp [file elife-34616-supp-v1.zip › elife_poa_e34616_Figure_2_figure_supplement_1.pdf]

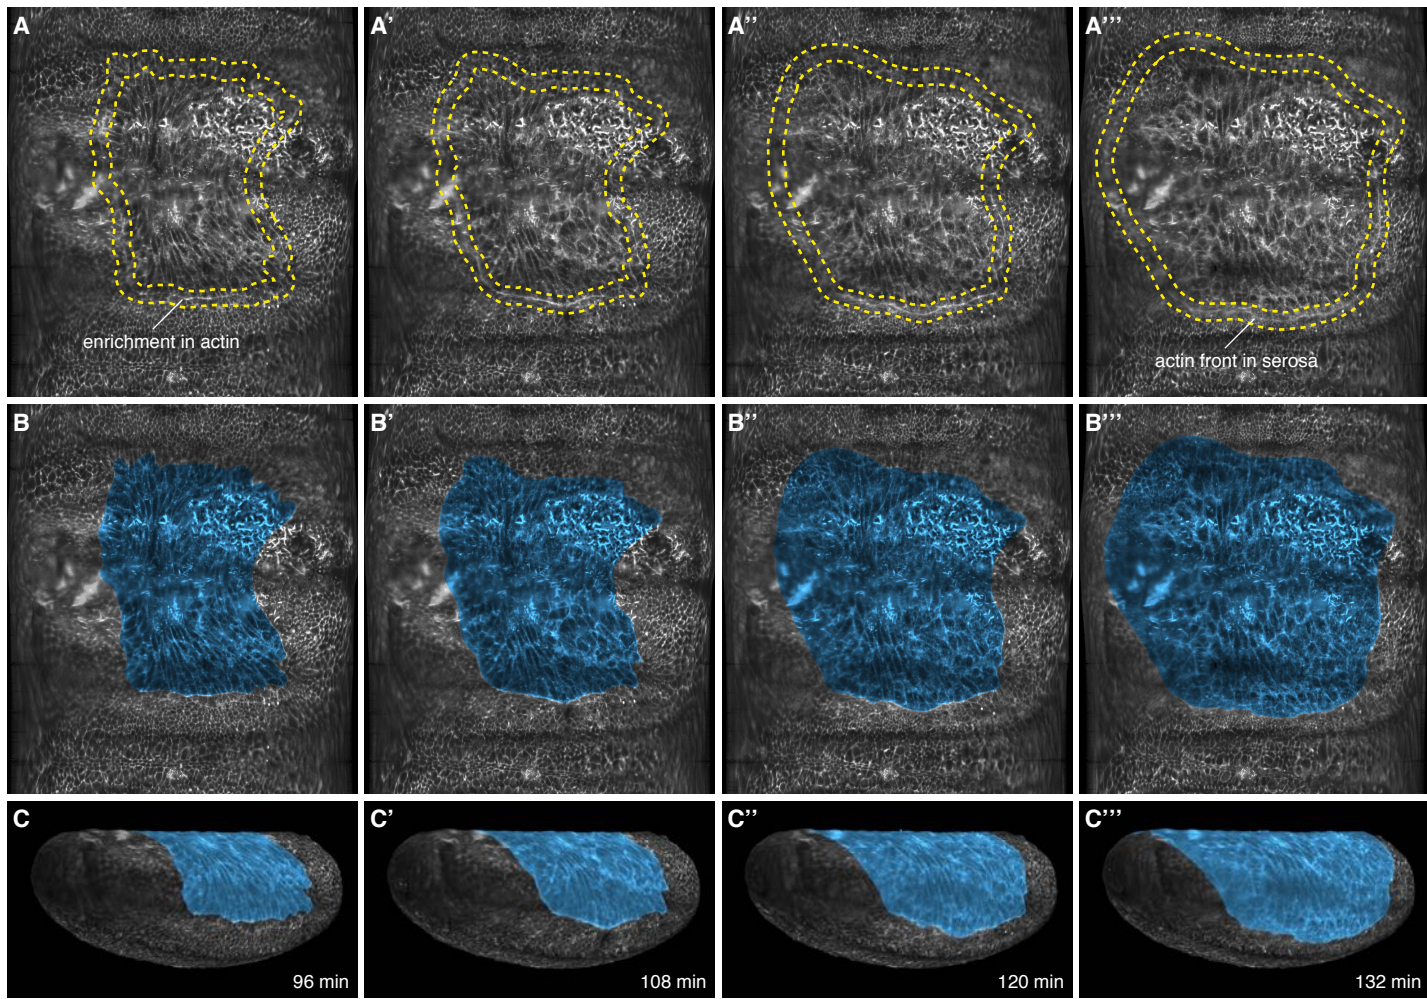

Supplement: supp [file elife-34616-supp-v1.zip › elife_poa_e34616_Figure_3_figure_supplement_1.pdf]
